# Supplementary material for: Correlation between Destructive and Non-Destructive Measurements of Highbush Blueberry (Vaccinium corymbosum L.) Fruit during Maturation
Source: MDPI journal article supplement (doi:10.3390/horticulturae9040501), 2023-04-17
Supplement: s1 [file s1]

Supplementary material Table S1: Individual sugars, organic acids and phenolics in blueberry fruit from different maturity stages.

|                                | Equivalents measure (where different) | Immature       | Light purple   | Darker purple  | Fully ripe      | Sign. |
|--------------------------------|---------------------------------------|----------------|----------------|----------------|-----------------|-------|
| <b>Sugars (mg/g FW)</b>        |                                       |                |                |                |                 |       |
| Sucrose                        |                                       | 5.13 ± 0.77 c  | 5.86 ± 0.40 c  | 9.78 ± 0.72 b  | 10.99 ± 0.73 a  | ***   |
| Glucose                        |                                       | 22.75 ± 2.21 d | 43.96 ± 1.89 c | 50.35 ± 2.07 b | 64.20 ± 1.36 a  | ***   |
| Fructose                       |                                       | 4.81 ± 0.60 d  | 41.80 ± 1.91 c | 49.86 ± 2.02 b | 66.96 ± 2.57 a  | ***   |
| <b>Total sugars</b>            |                                       | 32.68 ± 3.35 d | 91.63 ± 3.77 c | 110.0 ± 4.59 b | 142.16 ± 3.11 a | ***   |
| <b>Organic acids (mg/g FW)</b> |                                       |                |                |                |                 |       |
| Citric acid                    |                                       | 38.16 ± 1.26 a | 29.21 ± 1.44 b | 26.91 ± 1.05 c | 17.25 ± 0.86 d  | ***   |
| Tartaric acid                  |                                       | 1.08 ± 0.14 a  | 0.66 ± 0.02 b  | 0.68 ± 0.11 c  | 0.85 ± 0.07 b   | ***   |
| Malic acid                     |                                       | 7.11 ± 0.94 a  | 4.16 ± 0.51 b  | 2.35 ± 0.52 c  | 1.29 ± 0.13 d   | ***   |
| Shikimic acid                  |                                       | 0.018 ± 0.004  | 0.017 ± 0.004  | 0.026 ± 0.008  | 0.019 ± 0.005   | NS    |
| <b>Total organic acids</b>     |                                       | 46.36 ± 2.27 a | 34.04 ± 1.42 b | 29.96 ± 1.42 c | 19.41 ± 0.94 d  | ***   |
| <b>Phenolics (mg/100 g FW)</b> |                                       |                |                |                |                 |       |
| <b>Phenolic acids</b>          |                                       |                |                |                |                 |       |
| Ellagic acid derivative        |                                       | 1.42 ± 0.10 c  | 2.14 ± 0.29 c  | 23.50 ± 1.88 b | 61.93 ± 3.60 a  | ***   |
| Caffeic acid derivative 1      |                                       | 0.02 ± 0.00 c  | 0.03 ± 0.00 c  | 0.19 ± 0.02 b  | 0.63 ± 0.06 a   | ***   |
| Caffeic acid derivative 2      |                                       | 2.03 ± 0.11 c  | 1.97 ± 0.24 c  | 3.96 ± 0.60 b  | 13.59 ± 1.09 a  | ***   |
| 4-Caffeoylquinic acid          |                                       | 2.73 ± 0.37 ab | 2.32 ± 0.31 b  | 2.87 ± 0.23 ab | 3.08 ± 0.46 a   | ***   |
| 5-Caffeoylquinic acid          |                                       | 162.8 ± 6.79 a | 103.4 ± 6.61 c | 116.1 ± 9.74 b | 95.34 ± 6.14 c  | ***   |
| Caffeoylquinic acid dimer      | Chlorogenic acid                      | 0.57 ± 0.07 c  | 0.39 ± 0.04 d  | 0.76 ± 0.04 b  | 0.86 ± 0.01 a   | ***   |
| 5-Feruloylquinic acid          | Ferulic acid                          | 0.05 ± 0.01 d  | 0.20 ± 0.11 c  | 0.64 ± 0.07 b  | 0.85 ± 0.13 a   | ***   |
| Ferulic acid derivative        |                                       | 3.84 ± 0.43 a  | 4.16 ± 0.38 a  | 3.01 ± 0.09 b  | 3.99 ± 0.42 a   | ***   |
| <b>Total phenolic acids</b>    |                                       | 173.5 ± 7.40 a | 114.6 ± 7.04 c | 151.1 ± 8.59 b | 180.3 ± 11.15 a | ***   |

|                                          |                                     |                |                |                |                 |     |
|------------------------------------------|-------------------------------------|----------------|----------------|----------------|-----------------|-----|
| <b>Flavan-3-ols</b>                      |                                     |                |                |                |                 |     |
| Procyanidin B1                           |                                     | 9.40 ± 0.75 c  | 10.22 ± 2.02 c | 20.62 ± 1.70 b | 29.76 ± 1.67 a  | *** |
| Procyanidin B2                           | Procyanidin B1                      | 12.04 ± 1.87 c | 11.32 ± 0.35 c | 15.27 ± 0.58 b | 24.53 ± 1.54 a  | *** |
| Catechin                                 |                                     | 5.83 ± 0.31 c  | 4.70 ± 0.88 c  | 7.53 ± 0.69 b  | 14.03 ± 1.02 a  | *** |
| Epicatechin                              |                                     | 2.76 ± 0.55    | 2.42 ± 0.24    | 3.06 ± 0.23    | 3.04 ± 0.66     | NS  |
| <b>Total flavan-3-ols</b>                |                                     | 30.03 ± 2.79 c | 28.65 ± 3.21 c | 46.48 ± 2.86 b | 71.37 ± 4.26 a  | *** |
| <b>Flavonols</b>                         |                                     |                |                |                |                 |     |
| Myricetin-3- <i>O</i> -pentoside         | Myricetin-3- <i>O</i> -rhamnoside   | 0.57 ± 0.08 b  | 0.55 ± 0.04 b  | 0.79 ± 0.13 a  | 0.53 ± 0.11 b   | **  |
| Myricetin-3- <i>O</i> -hexoside          | Myricetin-3- <i>O</i> -rhamnoside   | 0.15 ± 0.03 c  | 0.15 ± 0.03 c  | 0.35 ± 0.09 b  | 0.97 ± 0.05 a   | *** |
| Myricetin-rhamno-hexoside                | Myricetin-3- <i>O</i> -rhamnoside   | 0.14 ± 0.01 c  | 0.39 ± 0.09 b  | 0.95 ± 0.07 a  | 1.11 ± 0.18 a   | *** |
| Laricitrin-3- <i>O</i> -glucoside        | Kaempferol-3- <i>O</i> -glucoside   | 0.74 ± 0.09 c  | 1.25 ± 0.20 b  | 1.66 ± 0.15 a  | 0.87 ± 0.17 c   | *** |
| Quercetin-3- <i>O</i> -rutinoside        |                                     | 3.72 ± 0.46 a  | 2.89 ± 0.39 b  | 4.01 ± 0.34 a  | 2.87 ± 0.32 b   | *** |
| Quercetin-3- <i>O</i> -galactoside       |                                     | 5.16 ± 0.24 c  | 8.69 ± 1.30 b  | 11.52 ± 1.06 a | 6.08 ± 1.16 c   | *** |
| Quercetin-3- <i>O</i> -glucoside         |                                     | 4.74 ± 0.49 bc | 5.07 ± 0.65 b  | 6.72 ± 0.61 a  | 4.05 ± 0.70 c   | *** |
| Quercetin-3- <i>O</i> -glucuronide       |                                     | 1.63 ± 0.21 c  | 2.52 ± 0.36 b  | 3.43 ± 0.59 a  | 1.90 ± 0.36 bc  | *** |
| Quercetin-3- <i>O</i> -arabinopyranoside |                                     | 1.46 ± 0.12 a  | 0.93 ± 0.15 b  | 1.37 ± 0.17 a  | 1.11 ± 0.14 b   | *** |
| Quercetin-3- <i>O</i> -arabinofuranoside |                                     | 0.17 ± 0.01 d  | 0.27 ± 0.04 c  | 0.43 ± 0.04 b  | 0.49 ± 0.02 a   | *** |
| Kaempferol-3- <i>O</i> -rutinoside       | Kaempferol-3- <i>O</i> -glucoside   | 0.63 ± 0.06 b  | 0.53 ± 0.06 b  | 0.79 ± 0.11 a  | 0.54 ± 0.05 b   | **  |
| Isorhamnetin-3- <i>O</i> -galactoside    | Isorhamnetin-3- <i>O</i> -glucoside | 0.06 ± 0.01 c  | 0.08 ± 0.01 c  | 0.56 ± 0.04 b  | 1.96 ± 0.17 a   | *** |
| Isorhamnetin-3- <i>O</i> -rutinoside     | Isorhamnetin-3- <i>O</i> -glucoside | 6.82 ± 0.40 c  | 11.56 ± 1.34 b | 14.94 ± 1.80 a | 7.85 ± 0.42 c   | *** |
| Syringetin-3- <i>O</i> -glucoside        | Myricetin-3- <i>O</i> -rhamnoside   | 0.05 ± 0.01 d  | 0.09 ± 0.01 c  | 0.13 ± 0.02 b  | 0.15 ± 0.01 a   | *** |
| <b>Total flavonols</b>                   |                                     | 26.06 ± 1.49 c | 34.97 ± 4.23 b | 47.65 ± 4.44 a | 30.48 ± 3.60 bc | *** |
| <b>Anthocyanins</b>                      |                                     |                |                |                |                 |     |
| Delphinidin-3- <i>O</i> -galactoside     | Delphinidin-3- <i>O</i> -glucoside  | 0.00 ± 0.00 c  | 0.02 ± 0.00 c  | 0.87 ± 0.15 b  | 2.34 ± 0.33 a   | *** |
| Delphinidin-3- <i>O</i> -glucoside       |                                     | 0.00 ± 0.00 c  | 2.72 ± 0.34 c  | 27.91 ± 1.81 b | 79.58 ± 7.07 a  | *** |
| Delphinidin-3- <i>O</i> -arabinoside     | Delphinidin-3- <i>O</i> -glucoside  | 0.00 ± 0.00 c  | 1.76 ± 0.23 c  | 10.87 ± 1.23 b | 21.10 ± 2.72 a  | *** |

|                                    |                                 |                 |                  |                 |                 |     |
|------------------------------------|---------------------------------|-----------------|------------------|-----------------|-----------------|-----|
| Cyanidin-3- <i>O</i> -galactoside  |                                 | 0.00 ± 0.00 d   | 1.88 ± 0.14 c    | 9.22 ± 0.87 b   | 18.31 ± 0.90 a  | *** |
| Cyanidin-3- <i>O</i> -arabinoside  | Cyanidin-3- <i>O</i> -glucoside | 0.00 ± 0.00 d   | 0.46 ± 0.07 c    | 1.79 ± 0.21 b   | 2.66 ± 0.10 a   | *** |
| Petunidin-3- <i>O</i> -galactoside |                                 | 0.00 ± 0.00 c   | 0.90 ± 0.15 c    | 10.88 ± 1.32 b  | 46.71 ± 2.78 a  | *** |
| Petunidin-3- <i>O</i> -arabinoside |                                 | 0.00 ± 0.00 c   | 0.28 ± 0.03 c    | 2.47 ± 0.65 b   | 13.44 ± 1.62 a  | *** |
| Peonidin-3- <i>O</i> -galactoside  | Peonidin-3- <i>O</i> -glucoside | 0.00 ± 0.00 c   | 0.09 ± 0.01 c    | 0.81 ± 0.15 b   | 4.42 ± 0.45 a   | *** |
| Peonidin-pentose                   | Peonidin-3- <i>O</i> -glucoside | 0.00 ± 0.00 d   | 0.07 ± 0.01 c    | 0.67 ± 0.05 b   | 2.91 ± 0.03 a   | *** |
| Malvidin-3- <i>O</i> -hexoside     | Malvidin-3- <i>O</i> -glucoside | 0.00 ± 0.00 c   | 3.94 ± 0.89 c    | 99.83 ± 9.66 b  | 667.0 ± 36.7 a  | *** |
| Malvidin-3- <i>O</i> -arabinoside  | Malvidin-3- <i>O</i> -glucoside | 0.00 ± 0.00 c   | 0.56 ± 0.10 c    | 9.37 ± 0.77 b   | 60.47 ± 4.63 a  | *** |
| Malvidin-3- <i>O</i> -xyloside     | Malvidin-3- <i>O</i> -glucoside | 0.00 ± 0.00 c   | 0.86 ± 0.13 c    | 26.62 ± 1.87 b  | 210.0 ± 18.21 a | *** |
| <b>Total anthocyanins</b>          |                                 | 0.00 ± 0.00 c   | 13.55 ± 1.34 c   | 201.3 ± 15.32 b | 1129 ± 23.90 a  | *** |
| <b>Total phenolics</b>             |                                 | 229.6 ± 10.11 c | 191.79 ± 11.96 d | 446.5 ± 21.70 b | 1411 ± 32.11 a  | *** |

Data are means ± standard errors of 4 replicates. Data with different letters between maturity stages are significantly different (Duncan test;  $\alpha < 0.05$ ).

\*\*,  $p < 0.01$ ; \*\*\*,  $p < 0.001$ ; NS, not significant.
